# Supplementary material
Source: publisher figshare collection journal article supplement (https://springernature.figshare.com/ndownloader/files/21416511)

# Research: Tracks of admission for Chulalongkorn dental school during 2005-2011 related to retention of dentists in Thai government services

This research is a part of the subject: Research methodology for academic year 2017  
Faculty of dentistry, Chulalongkorn university

## Research objectives

1. To determine percentage of dentists in Thai government services who admit in academic year 2005-2011.
2. To compare number of dentists who work and resigned in the Thai governments services in each tracks of the dental school admission.
3. To identify the association of tracks of admission during academic year 2005-2011 and retention of dentists in Thai government services.
4. To examine the factor associated with retention and resignation from the Thai governments services of dentist from each tracks of the dental school admission.

## Anticipated Benefit Gain

This study aims to identify the association between the tracks of admission for Chulalongkorn dental school and retention of dentists in government Thai services, which benefit future dental manpower planning in the rural areas.

## Participant Information Sheet (ฉบับ. 2.4)

Link : <https://drive.google.com/open?id=184ZON9oZOSs8oxVehahYzJWJwDsXd8vs>

## Withdrawal Form (ฉบับ. 2.6)

Link : [https://drive.google.com/open?id=1EFqeiava\\_e7\\_sd\\_crxyqYDzhTOvM16Uq](https://drive.google.com/open?id=1EFqeiava_e7_sd_crxyqYDzhTOvM16Uq)

\*Required

-

1. **Do you read the participant information sheet and agree to participate in the research ? \***

*Mark only one oval.*

Yes

No *Stop filling out this form.*

**You already read the participant information sheet and agree to participate in the research.**

## Part I

**2. Age (year) \****Mark only one oval.*

- 20-25
- 26-30
- 31-35
- 36-40
- > 40

**3. Gender \****Mark only one oval.*

- Male
- Female

**4. Marital status \****Mark only one oval.*

- Not married (Not answer in the "Number of children")
- Marriage and living together
- Marriage and not living together
- Divorced

**5. Number of children***Mark only one oval.*

- None
- 1
- 2
- more than 2

**6. The highest education \****Mark only one oval.*

- Doctor of Dental Surgery
- Graduate Diploma in Clinical Sciences
- Master of Science
- Higher Graduate Diploma in Clinical Sciences
- Doctor of Philosophy
- Residency Training Program
- Other: \_\_\_\_\_

**7. Hometown \***

Mark only one oval.

- Bangkok Metropolitan Region
- Northern Thailand
- Central Thailand
- Northeastern Thailand
- Western Thailand
- Southern Thailand

**8. Administration academic year in DDS \***

Mark only one oval.

- 2005
- 2006
- 2007
- 2008
- 2009
- 2010
- 2011

**9. Tracks of admission \***

Mark only one oval.

- Direct Admission for Consortium of Thai Medical and Dental school
- The Collaborative Project to Increase Production of Rural Dentists Program
- Chulalongkorn Rural Admission
- Direct Admission for Chulalongkorn Dental school
- Central University Admission System
- Admission for Students in the Southern Border Provinces, under the desire of Ministry of Interior

**10. Graduated academic year \***

Mark only one oval.

- 2010
- 2011
- 2012
- 2013
- 2014
- 2015
- 2016
- 2017

**Part II**

**11. Career \***

Mark only one oval.

- Dentist
- Dental professor
- Others

**12. Do you have your own private dental clinic or hospital ? \***

Mark only one oval.

- Yes
- No

**13. Where is your the most workplace in a month ? \***

Mark only one oval.

- Public health services      *Skip to question 14.*
- Ministry of University Affairs      *Skip to question 21.*
- Private health services      *Skip to question 32.*
- Private university      *Skip to question 27.*
- Other: \_\_\_\_\_ *Skip to question 42.*

## Public health services

**14. Affiliation of work \***

Mark only one oval.

- Ministry of Public Health
- Ministry of Defence
- Ministry of Inferior
- Other: \_\_\_\_\_

**15. Is your hometown and workplace as in the same provinces ? \***

Mark only one oval.

- Yes
- No

**16. Is your workplace's province has an airport ? \***

Mark only one oval.

- Yes
- No
- Nearby

**17. Total income from government services (Thai bath) \****Mark only one oval.*

- 10,001 - 20,000
- 20,001 - 30,000
- 30,001 - 40,000
- 40,001 - 50,000
- Over 50,000

**18. Other income (Thai bath) \****Mark only one oval.*

- None
- Under 10,000
- 10,001 - 20,000
- 20,001 - 30,000
- 30,001 - 40,000
- 40,001 - 50,000
- Over 50,000
- Other: \_\_\_\_\_

**19. Hospital size (Number of bed) \****Mark only one oval.*

- 30
- 60
- 90
- 120
- Over 120

**20. Number of dentists in the hospital that you work (including you) \****Mark only one oval.*

- 1
- 2
- 3
- 4
- 5
- 6
- 7
- 8
- 9
- 10
- Over 10

Skip to question 36.

## Ministry of University Affairs

21. **Affiliation of work \***

Mark only one oval.

- Chulalongkorn university
- Mahidol university
- Thammasat university
- Srinakharinwirot university
- Khonkaen university
- Chiang Mai University
- Naresuan university
- Prince of Songkla University
- University of Phayao
- Mae Fah Luang University
- College of public health, Ministry of Public Health
- Suranaree University of Technology
- Burapha University

22. **Academic ranks \***

Mark only one oval.

- Lecturer
- Assistant professor
- Associate professor
- Professor
- General dental practitioner in university services

23. **Is you have a contract-bonding from Thai government service or university ? \***

Mark only one oval.

- Yes
- No

24. **Is your hometown and workplace as in the same provinces ? \***

Mark only one oval.

- Yes
- No

**25. Total income from university (Thai bath) \****Mark only one oval.*

- 10,001 - 20,000
- 20,001 - 30,000
- 30,001 - 40,000
- 40,001 - 50,000
- Over 50,000

**26. Other income (Thai bath) \****Mark only one oval.*

- None
- under 10,000
- 10,001 - 20,000
- 20,001 - 30,000
- 30,001 - 40,000
- 40,001 - 50,000
- Over 50,000

*Skip to question 36.***Private University****27. Affiliation of work***Mark only one oval.*

- Rangsit university
- Western university

**28. Academic ranks \****Mark only one oval.*

- Lecturer
- Assistant professor
- Associate professor
- Professor
- General dental practitioner in university services

**29. Is you have a contract-bonding from university ? \****Mark only one oval.*

- Yes
- No

**30. Total income from university (Thai bath) \****Mark only one oval.*

- 10,001 - 20,000
- 20,001 - 30,000
- 30,001 - 40,000
- 40,001 - 50,000
- Over 50,000

**31. Other income (Thai bath) \****Mark only one oval.*

- None
- Under 10,000
- 10,001 - 20,000
- 20,001 - 30,000
- 30,001 - 40,000
- 40,001 - 50,000
- Over 50,000

*Skip to question 42.***Private health services****32. Total income from private hospital (Thai bath) \****Mark only one oval.*

- 10,001 - 20,000
- 20,001 - 30,000
- 30,001 - 40,000
- 40,001 - 50,000
- Over 50,000

**33. Other income (Thai bath) \****Mark only one oval.*

- None
- Under 10,000
- 10,001 - 20,000
- 20,001 - 30,000
- 30,001 - 40,000
- 40,001 - 50,000
- Over 50,000



**34. Type of private services \***

Mark only one oval.

- Private hospital
- Private clinic

**35. Number of dentists in the hospital that you work (including you) \***

Mark only one oval.

- 1
- 2
- 3
- 4
- 5
- 6
- 7
- 8
- 9
- 10
- Over 10

Skip to question 42.

**Part III****36. What is your first workplace after graduated from DDS program \***

Mark only one oval.

- Public health services
- Ministry of University Affairs
- Private health services
- Private university
- Other: \_\_\_\_\_

**37. Duration of work in Thai government services (Year) \***

\_\_\_\_\_

**38. Have you ever changed the workplace? (If you answer "ever", answer in the next question, please )**

Mark only one oval.

- ever
- never

39. **What is the reasons to change workplace?**

---

40. **The reasons influencing retention in the Thai government services (Please select 3 position, in order of 1 from top to bottom.)**

\* If you have other reasons, you can answer in the next section.

*Tick all that apply.*

|                                                                | The 1st rating           | The 2nd rating           | The 3rd rating           |
|----------------------------------------------------------------|--------------------------|--------------------------|--------------------------|
| Close proximity to hometown                                    | <input type="checkbox"/> | <input type="checkbox"/> | <input type="checkbox"/> |
| income                                                         | <input type="checkbox"/> | <input type="checkbox"/> | <input type="checkbox"/> |
| Security in the profession                                     | <input type="checkbox"/> | <input type="checkbox"/> | <input type="checkbox"/> |
| Advancement in the profession                                  | <input type="checkbox"/> | <input type="checkbox"/> | <input type="checkbox"/> |
| Satisfaction with relationship with leaderships and colleagues | <input type="checkbox"/> | <input type="checkbox"/> | <input type="checkbox"/> |
| Satisfaction with welfare                                      | <input type="checkbox"/> | <input type="checkbox"/> | <input type="checkbox"/> |
| Freedom at works                                               | <input type="checkbox"/> | <input type="checkbox"/> | <input type="checkbox"/> |
| High chance to pursue specialty training in the future         | <input type="checkbox"/> | <input type="checkbox"/> | <input type="checkbox"/> |

41. **Other reasons**

---

## Part IV

42. **What is your first workplace after graduated from DDS program \***

*Mark only one oval.*

- Public health services
- Ministry of University Affairs
- Private health services
- Private university
- Other: \_\_\_\_\_

43. **Duration of work in Thai government services (Year)**

---

**44. The reasons influencing resignation from the Thai government services (Please select 3 position, ranked 1 for each reason.)**

*Tick all that apply.*

|                                                                   | The 1st rating           | The 2nd rating           | The 3rd rating           |
|-------------------------------------------------------------------|--------------------------|--------------------------|--------------------------|
| Workplace far away from hometown                                  | <input type="checkbox"/> | <input type="checkbox"/> | <input type="checkbox"/> |
| limited facilities in rural areas                                 | <input type="checkbox"/> | <input type="checkbox"/> | <input type="checkbox"/> |
| Dissatisfaction with income                                       | <input type="checkbox"/> | <input type="checkbox"/> | <input type="checkbox"/> |
| Dissatisfaction with relationship with leaderships and colleagues | <input type="checkbox"/> | <input type="checkbox"/> | <input type="checkbox"/> |
| Lack of advancement opportunities                                 | <input type="checkbox"/> | <input type="checkbox"/> | <input type="checkbox"/> |
| Lack of freedom at works                                          | <input type="checkbox"/> | <input type="checkbox"/> | <input type="checkbox"/> |
| Hard workload                                                     | <input type="checkbox"/> | <input type="checkbox"/> | <input type="checkbox"/> |
| Getting a specialty training                                      | <input type="checkbox"/> | <input type="checkbox"/> | <input type="checkbox"/> |
| Make their own private dental clinic                              | <input type="checkbox"/> | <input type="checkbox"/> | <input type="checkbox"/> |
| Other occupation                                                  | <input type="checkbox"/> | <input type="checkbox"/> | <input type="checkbox"/> |
| Health problems                                                   | <input type="checkbox"/> | <input type="checkbox"/> | <input type="checkbox"/> |
| Take care of the parents/children/married                         | <input type="checkbox"/> | <input type="checkbox"/> | <input type="checkbox"/> |

**45. Other reasons**

---

Powered by

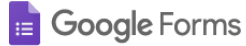

Supplement: Supplementary file [file 21416511]
